# Supplementary material
Source: PubMed Central journal article supplement (PMC3328095)
Supplement: NIHMS367376-supplement-Figure_1S.pdf [file NIHMS367376-supplement-Figure_1S.pdf]

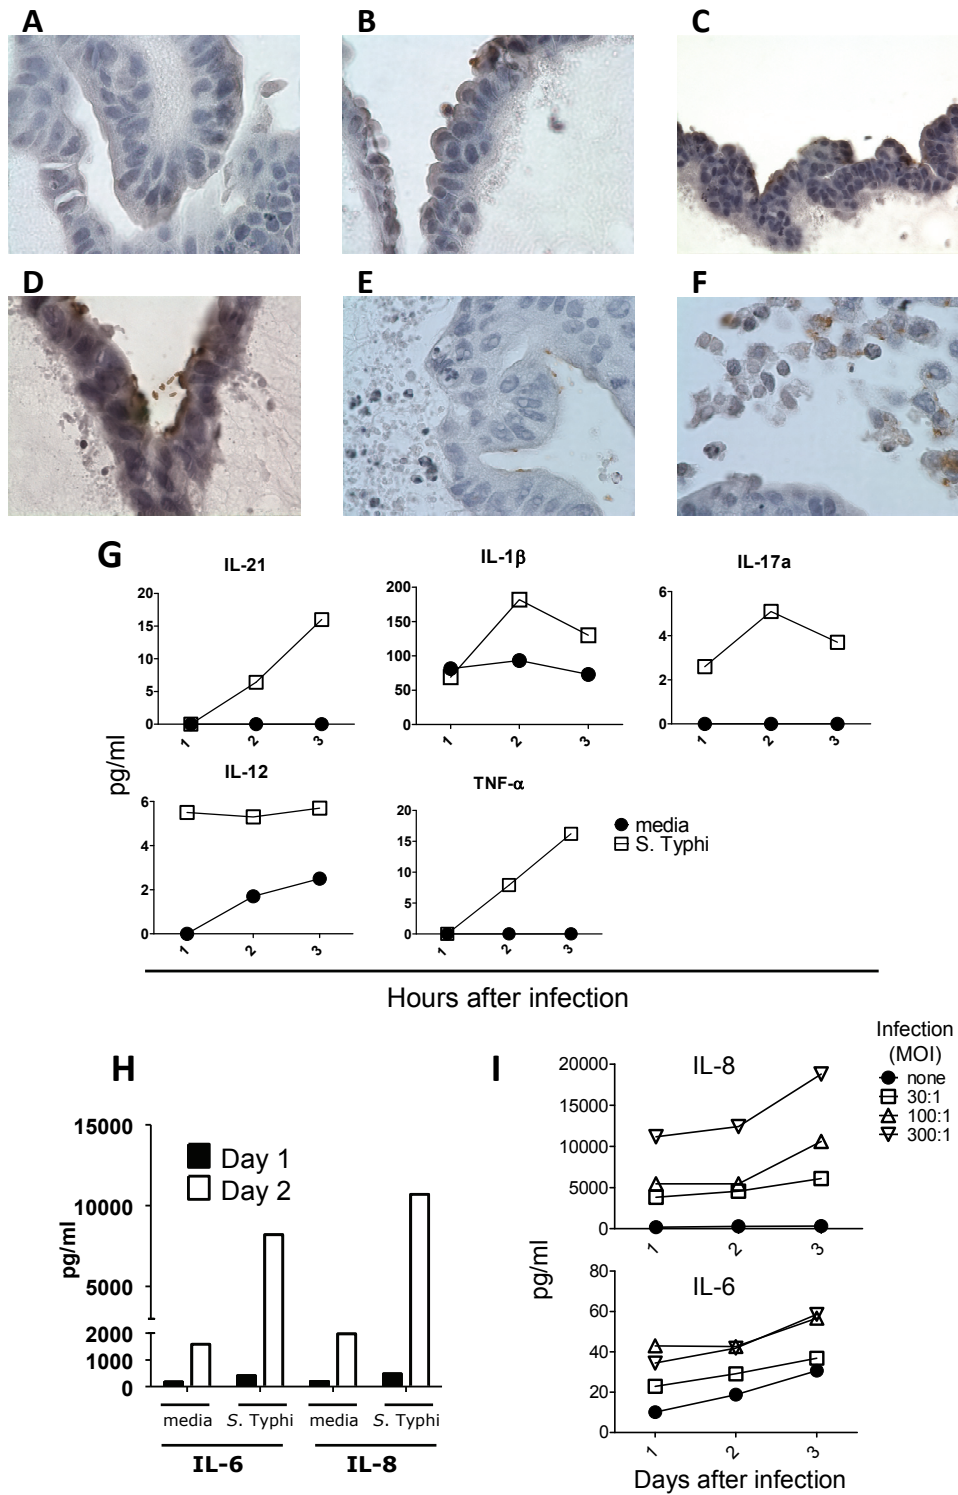

**Supplementary Figure 1.** Changes in epithelial cell morphology and cytokine production at different stages of the *Salmonella enterica* serovar Typhi (*S. Typhi*) infection. Cells from a 14-day 3-D organotypic culture were left uninfected (A) or infected with *Salmonella* Typhi at a MOI of 1,500:1 and immunohistochemically stained for *Salmonella* antigens using anti-CSA antiserum at 1 hour (B), 2 hours (C), 3 hours (D) and one day (epithelial monolayer, E and sloughed cells, F) after infection. 100X magnification. At the same time points supernatants were collected and cytokines measured by using the CBA multiplex assay (G and H). Dose-dependency of cytokine production by cells infected at different MOI was also performed (I).
